# Supplementary material for: Ontogeny and phylogeny: molecular signatures of selection, constraint, and temporal pleiotropy in the development of Drosophila
Source: PubMed Central journal article supplement (PMC2722573; doi:10.1186/1741-7007-7-42), 2009-07-21

**Supplementary File 2 - Average A)  $d_N$  and B)  $d_S$  values for genes classified into developmental stages based on EST data.** Averages are shown with permuted 95% confidence intervals for each specificity threshold: (from left to right, in increasing contrast) No specificity threshold, greater than two-fold representation, greater than four-fold representation, greater than eight-fold representation, and unique to that stage.

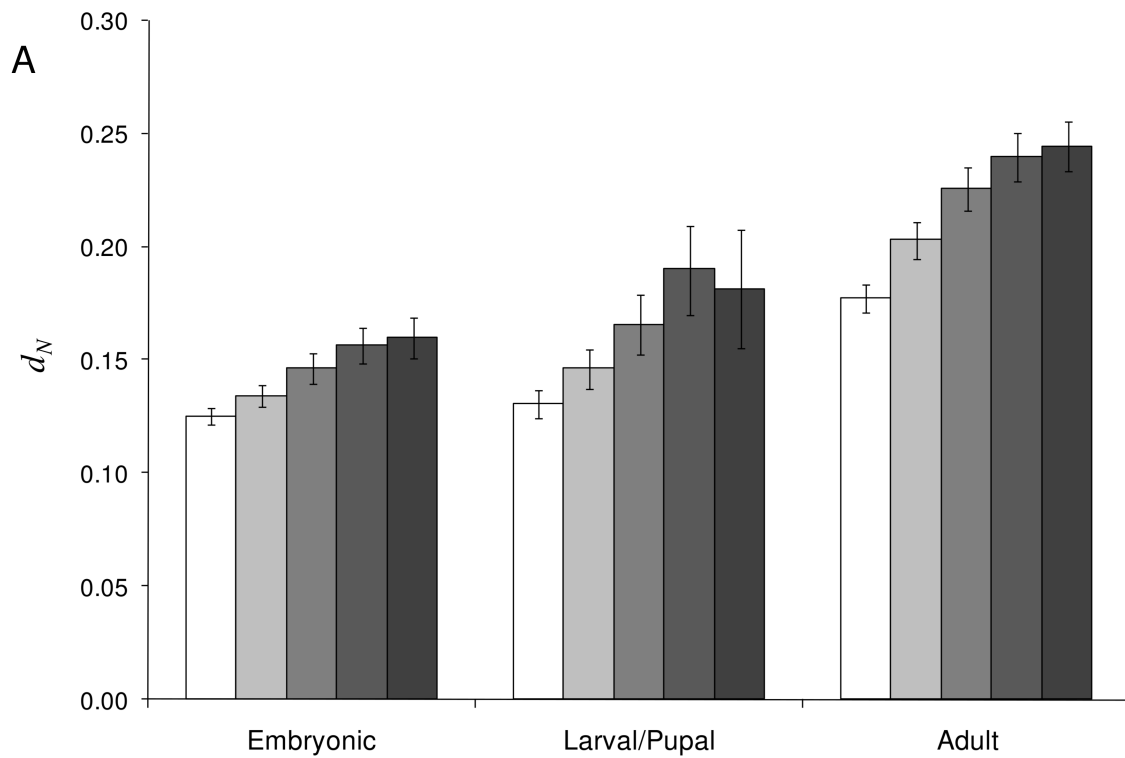

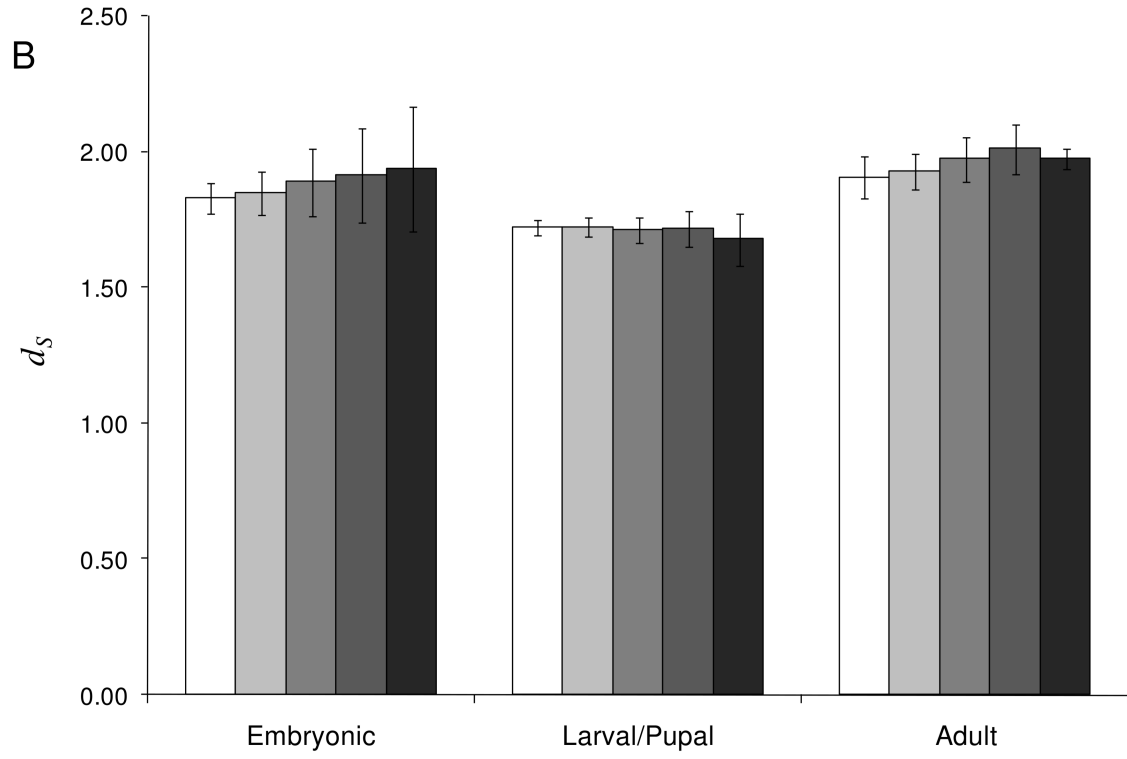

Supplement: 1741-7007-7-42-S8.pdf [file 1741-7007-7-42-S8.pdf]
