# Supplementary material for: Ontogeny and phylogeny: molecular signatures of selection, constraint, and temporal pleiotropy in the development of Drosophila
Source: PubMed Central journal article supplement (PMC2722573; doi:10.1186/1741-7007-7-42), 2009-07-21

**Supplementary File 3 - Box plots of  $d_N$ ,  $d_S$ , and  $d_N/d_S$  distributions for genes classified into gonadal or non-gonadal categories in the embryonic and adult stages based on EST data.** Distributions are shown for each specificity threshold: (from left to right, in increasing contrast) No specificity threshold, greater than 2-fold, 4-fold, or 8-fold proportion of representation relative to other stages/tissues, and unique to a single developmental stage/tissue. Box plots were produced both by combining the adult gonads (A, B, C) as well as by separating ovary and testis into distinct categories (D, E, F) (see Methods).

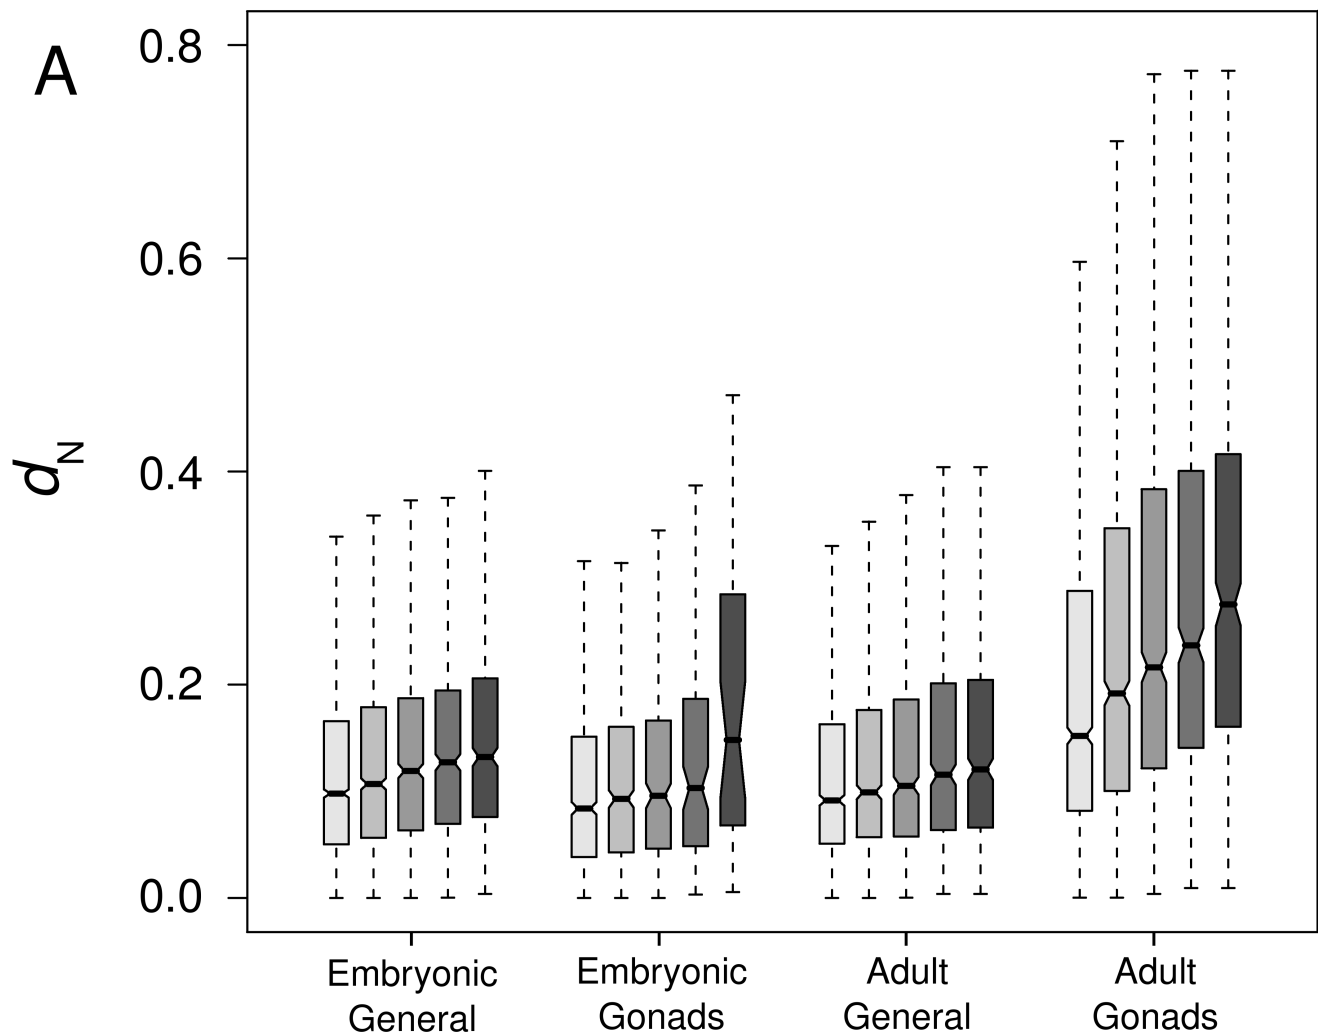

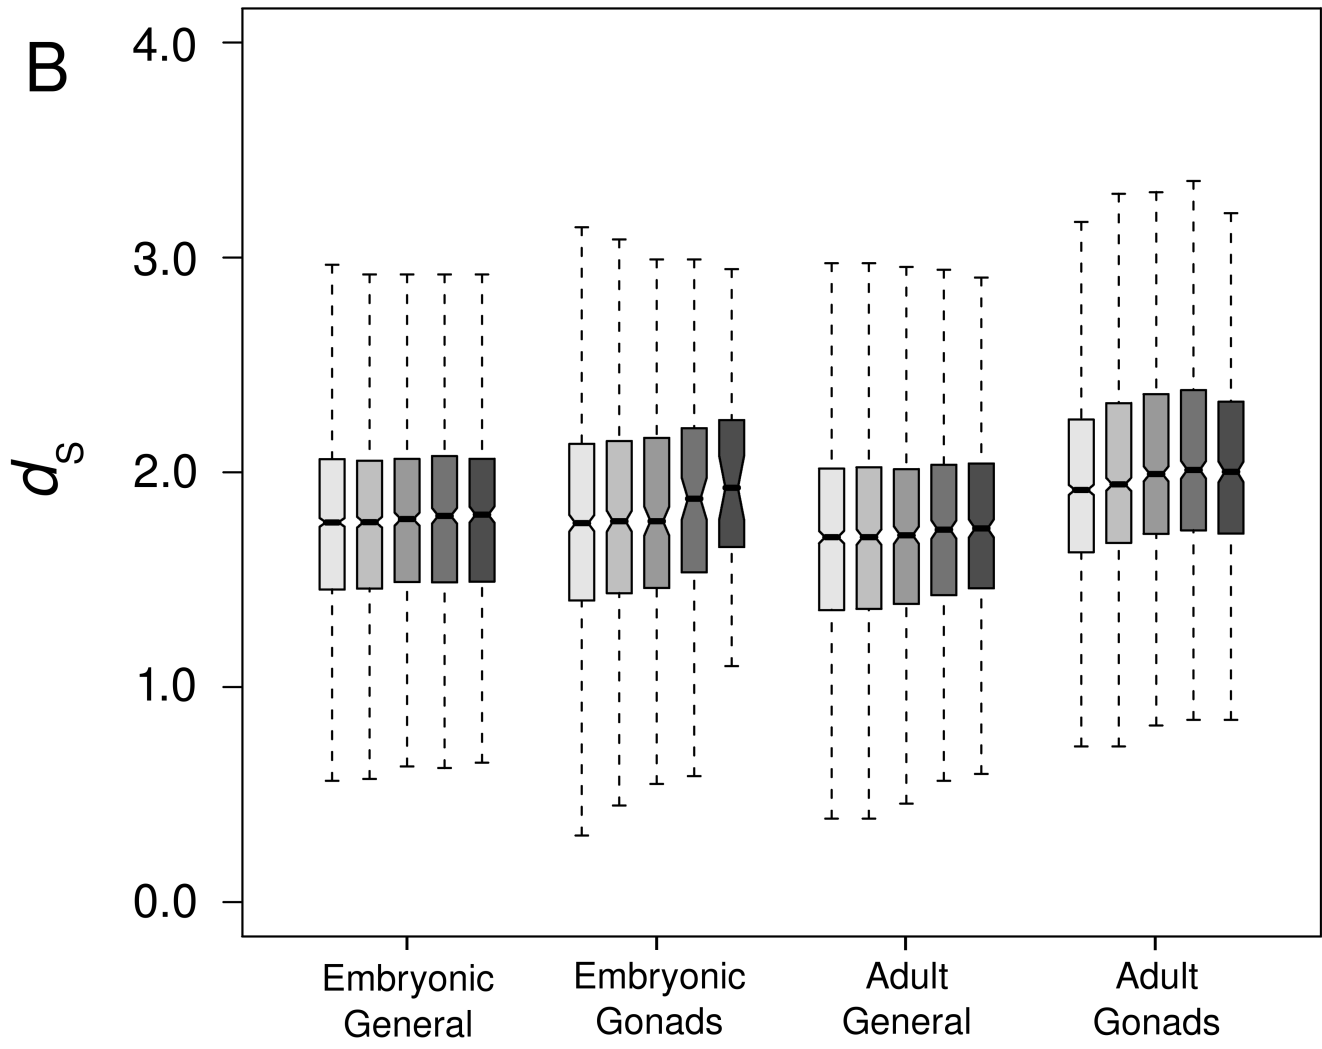

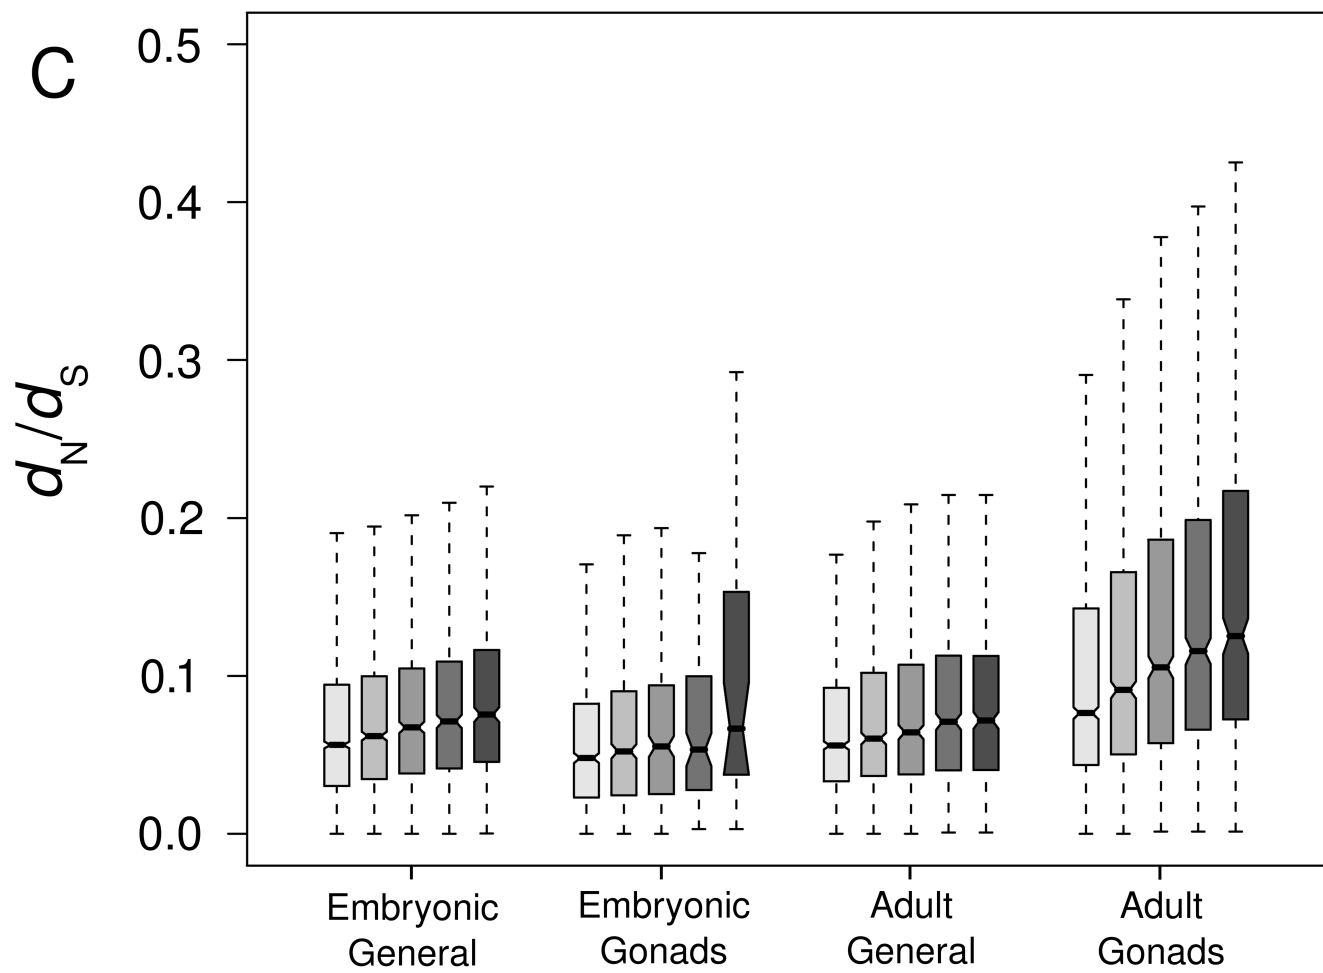

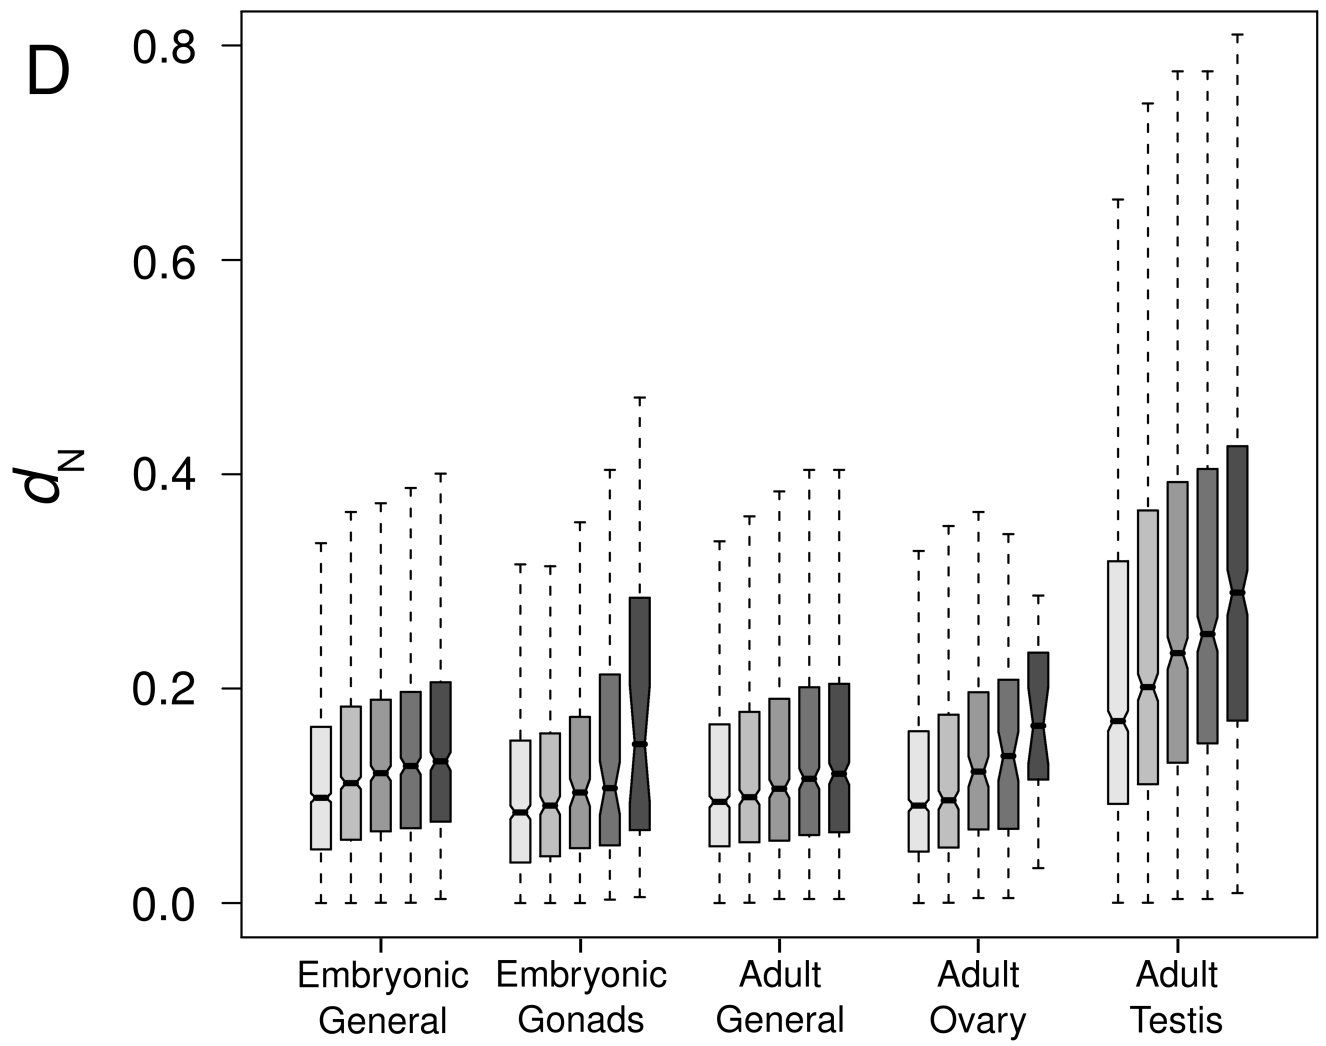

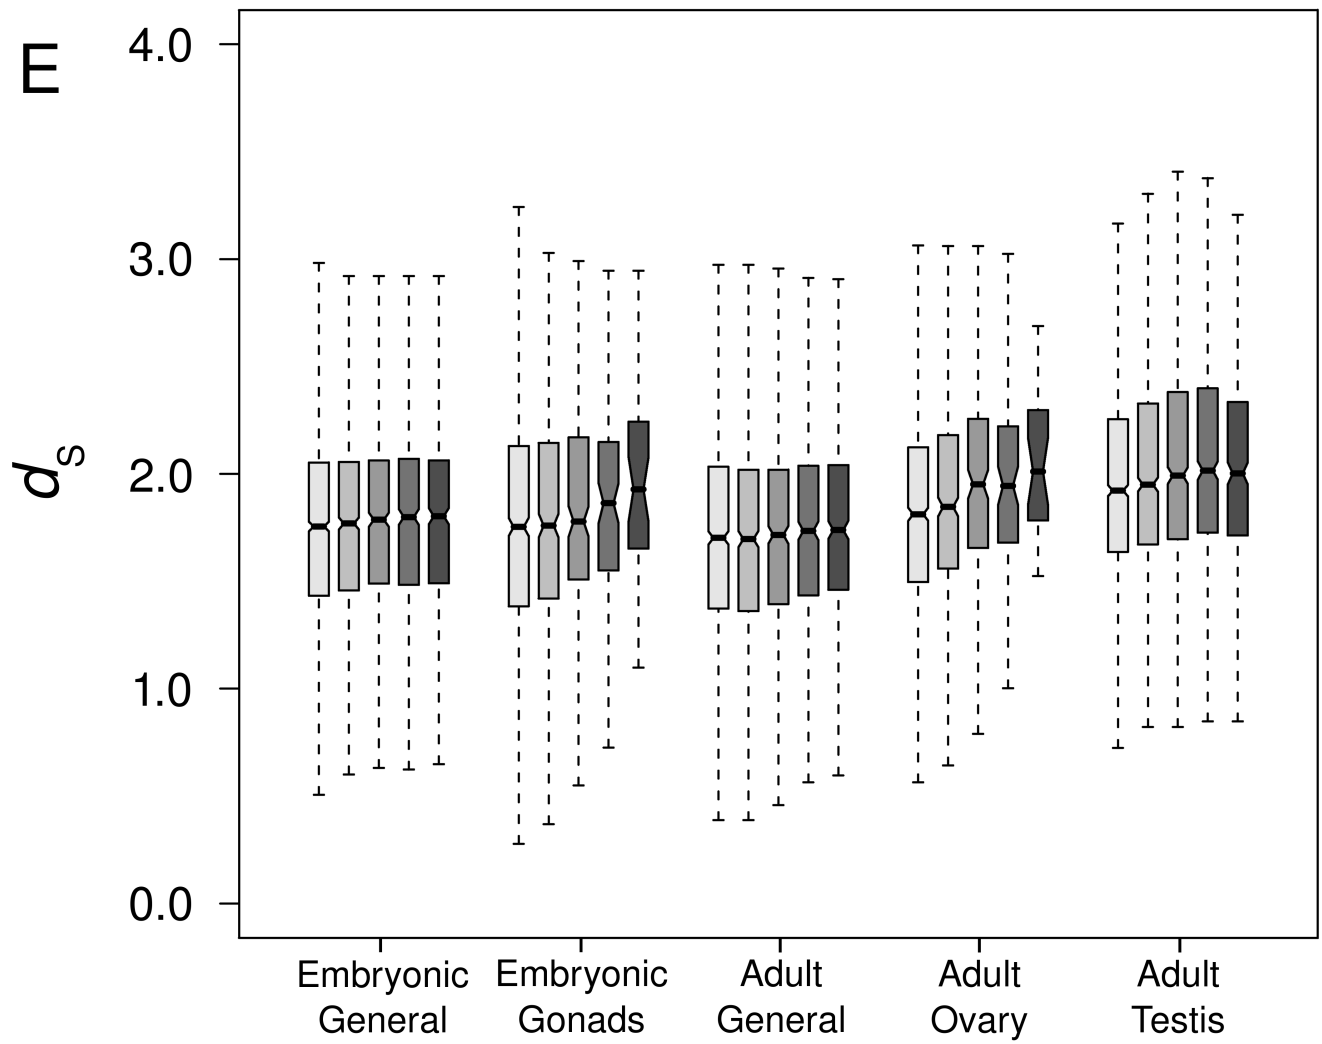

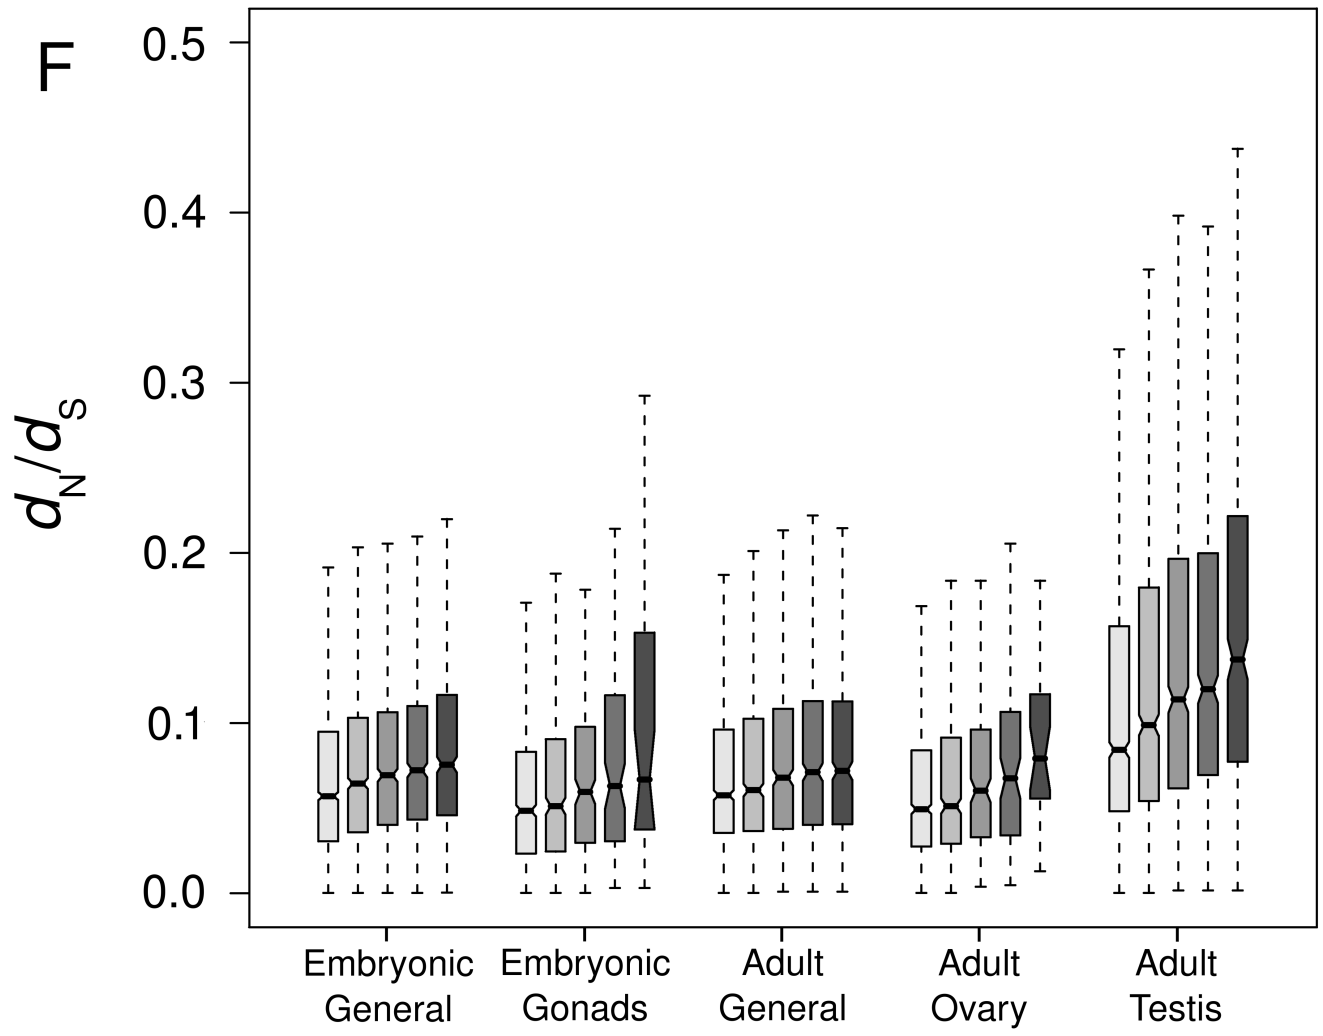

Supplement: 1741-7007-7-42-S10.pdf [file 1741-7007-7-42-S10.pdf]
